# Supplementary material for: Laparoscopy versus Laparotomy for the Treatment of BCLC Stages 0 or A Hepatocellular Carcinoma Associated with or without Microvascular Invasion: A Multicenter, Propensity Score Matching Analysis
Source: Research Square preprint supplement (doi:10.21203/rs.3.rs-1334237/v1), 2022-02-15
Supplement: Supplementary file 1 [file d4735998e98943bbadc6b166.docx]

| **Table S1 Intraoperative and postoperative parameters of HCC patients** | | | |
| --- | --- | --- | --- |
| Characteristics | laparoscopy (n= 243) | laparotomy (n = 252) | P-value |
| **Surgical variables** |  |  |  |
| Operation time (min) | 160 [115;230] | 180 [135;226] | 0.038 |
| Pringle’s maneuver | 73 (30.0%) | 44 (17.5%) | 0.001 |
| Blood loss (ml) | 200 [100;375] | 300 [200;500] | <0.001 |
| Transfusion | 21 (8.64%) | 51 (20.2%) | <0.001 |
| **Complications** |  |  |  |
| Hepatic failure | 0 (0.00%) | 2 (0.79%) | 0.499 |
| Bile leakage | 9 (3.70%) | 5 (1.98%) | 0.377 |
| Hydrothorax | 5 (2.06%) | 18 (7.14%) | 0.013 |
| Ascites | 5 (2.06%) | 26 (10.3%) | <0.001 |
| **Outcomes** |  |  |  |
| recurrence | 61 (25.1%) | 109 (43.3%) | <0.001 |
| death | 41 (16.9%) | 97 (38.5%) | <0.001 |
